# Supplementary material for: Electronic structure of CsPbBr3 with isovalent doping and divacancies: the smallest metal Pb cluster
Source: Royal Society of Chemistry journal article supplement (doi:10.1039/d4ta05802j), 2024-11-29
Supplement: d4ta05802j1.pdf [file d4ta05802j1.pdf]

## Supporting Information

### **Electronic Structure of CsPbBr<sub>3</sub> with Isovalent Doping and Divacancy: the Smallest Metal Pb Cluster**

Xiangyue Cui,<sup>1</sup> Bowen Wang,<sup>1</sup> Dandan Zhang,<sup>2</sup> Hongfei Chen,<sup>1</sup> Hejin Yan,<sup>1</sup> Zheng Shu,<sup>1</sup> Yongqing Cai<sup>1,\*</sup>

<sup>1</sup>*Joint Key Laboratory of the Ministry of Education, Institute of Applied Physics and Materials Engineering, University of Macau, Taipa, Macau, China*

<sup>2</sup>*Key Laboratory for Photonic and Electronic Bandgap Materials (Ministry of Education), School of Physics and Electronic Engineering, Harbin Normal University, Harbin 150025, People's Republic of China*

\*Corresponding author.

E-mail: yongqingcai@um.edu.mo (Yongqing Cai)

**Table S1** The space group, lattice parameters and total energies of the related solids adopted in the calculation of atomic chemical potential ( $\mu_i$ ) of CsPbBr<sub>3</sub>.

| Materials         | Space group               | Lattice parameters (Å)   | Total energy (eV/atom) |
|-------------------|---------------------------|--------------------------|------------------------|
| Cs                | <i>Fm-3m</i>              | $a = b = c = 7.76$       | -0.854                 |
| Pb                | <i>Fm-3m</i>              | $a = b = c = 5.02$       | -3.577                 |
| CsBr              | <i>Fm-3m</i>              | $a = b = c = 7.39$       | -6.107                 |
| PbBr <sub>2</sub> | <i>P4<sub>2</sub>/mnm</i> | $a = b = 7.17, c = 4.60$ | -9.663                 |

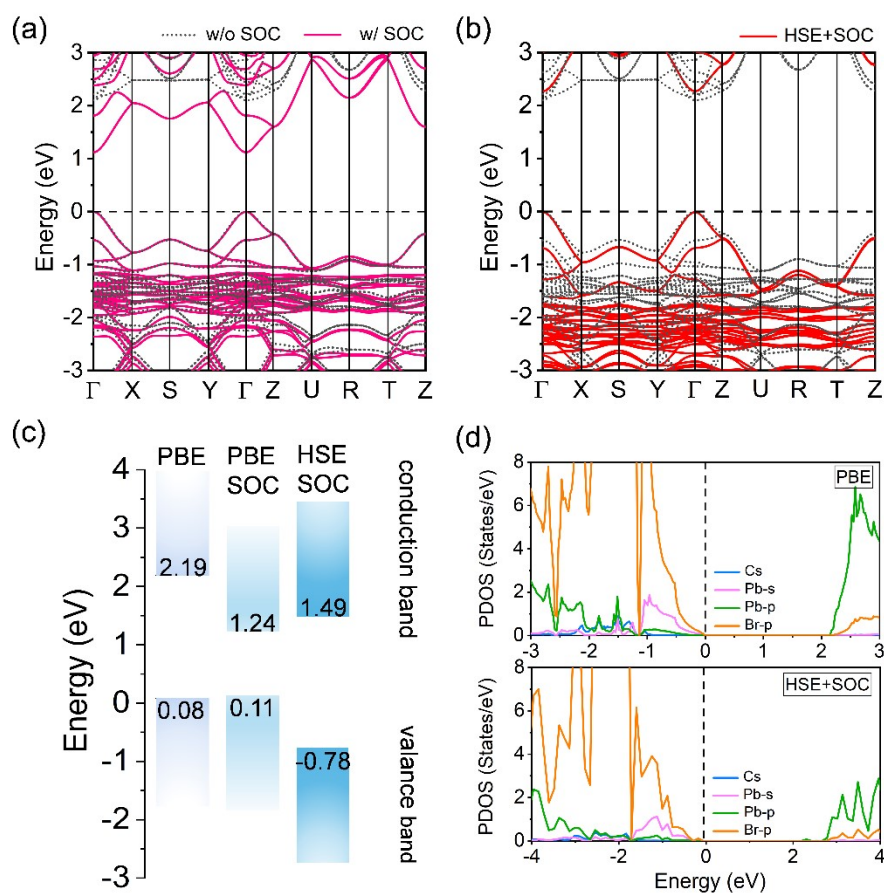

**Fig. S1** The electronic properties of pristine CsPbBr<sub>3</sub>. (a) Calculated band structure with- (pink lines) and without-SOC (gray dash lines) by PBE functional. (b) Band structure simulated by HSE hybrid functional combined with SOC (red solid lines). (c) Band alignment based on three schemes. (d) The results of PDOS under two types of functionals.

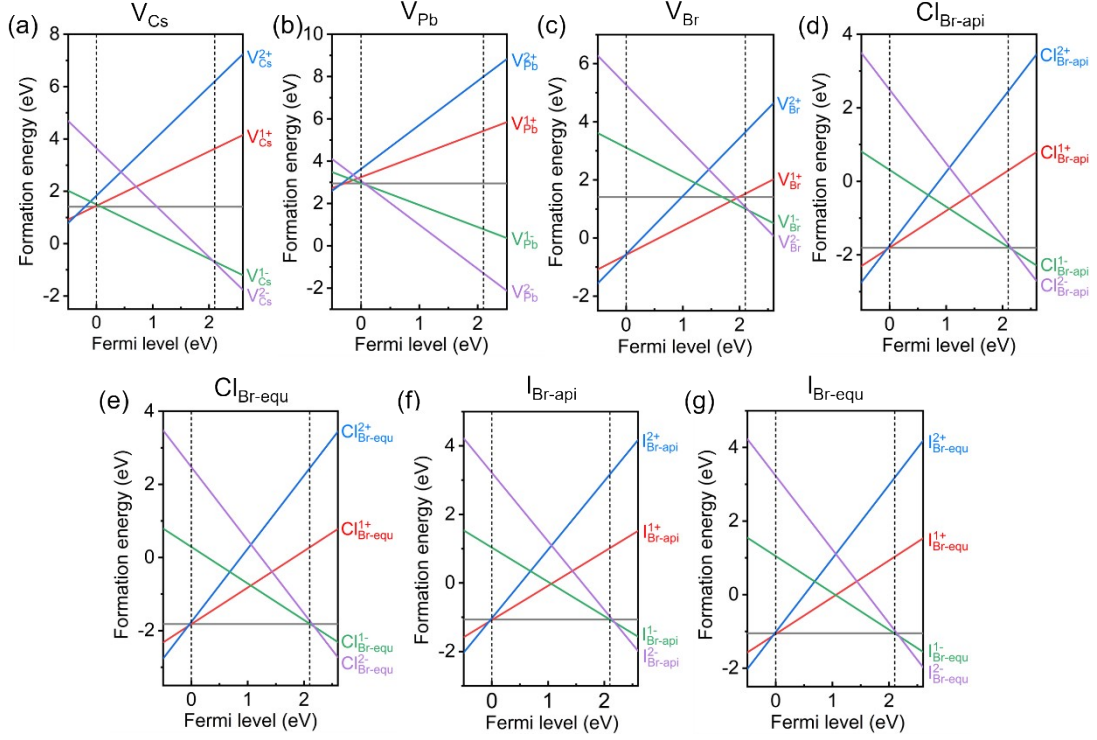

**Fig. S2** Formation energies of charged point defects under Pb-rich growth condition, where the charge states are shown adjacent to lines. The solid lines with grey represent the formation energies of defective  $\text{CsPbBr}_3$  at neutral state.

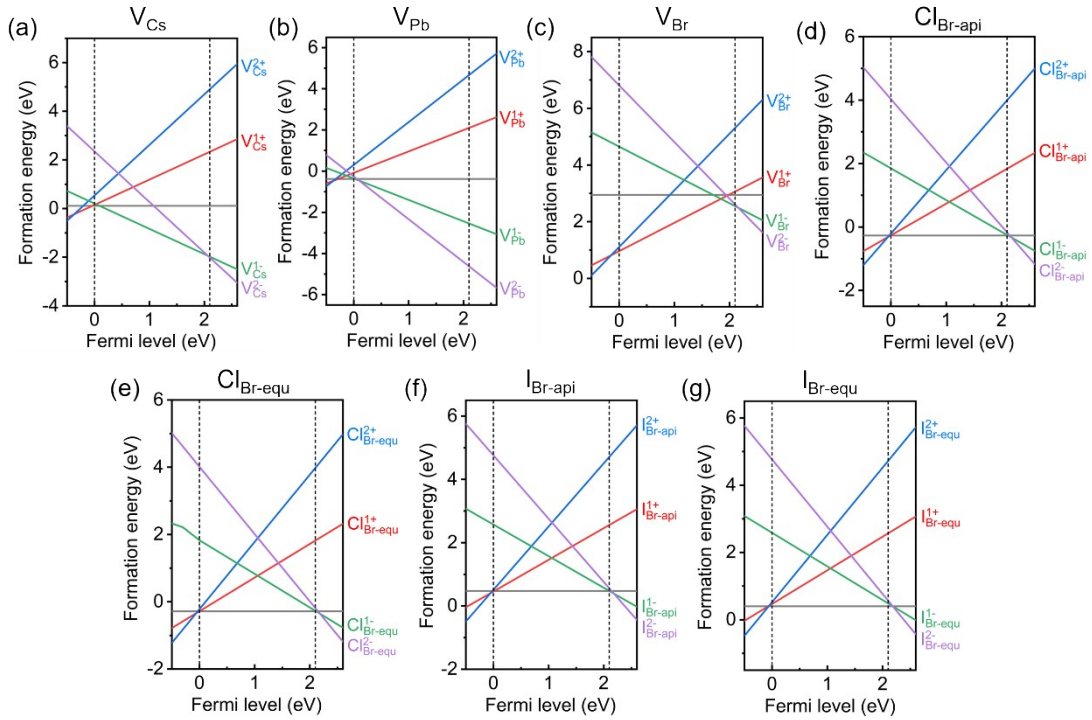

**Fig. S3** Formation energies of charged point defects under Br-rich growth condition,

where the charge states are shown adjacent to lines. The solid grey line represents the formation energy under neutral state.

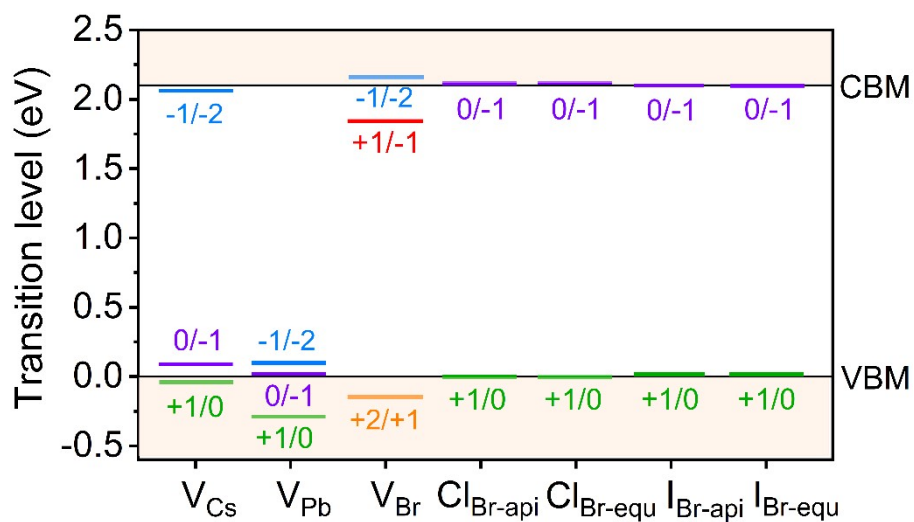

**Fig. S4** Charge transition energy levels of point defects in CsPbBr<sub>3</sub> under Br-rich growth condition.

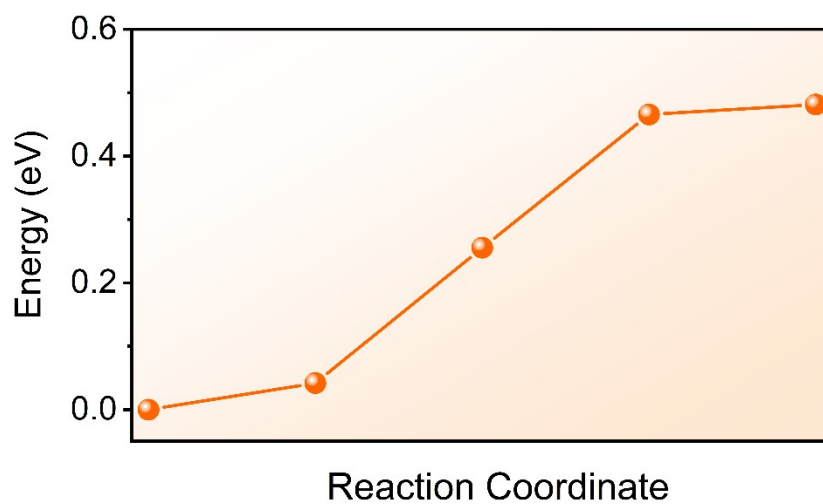

**Fig. S5** The reaction energy for migration process of the V1- Br, where the initial and final state is V1- Br (dimmer-like) and V1- Br (unbound) structure, respectively.

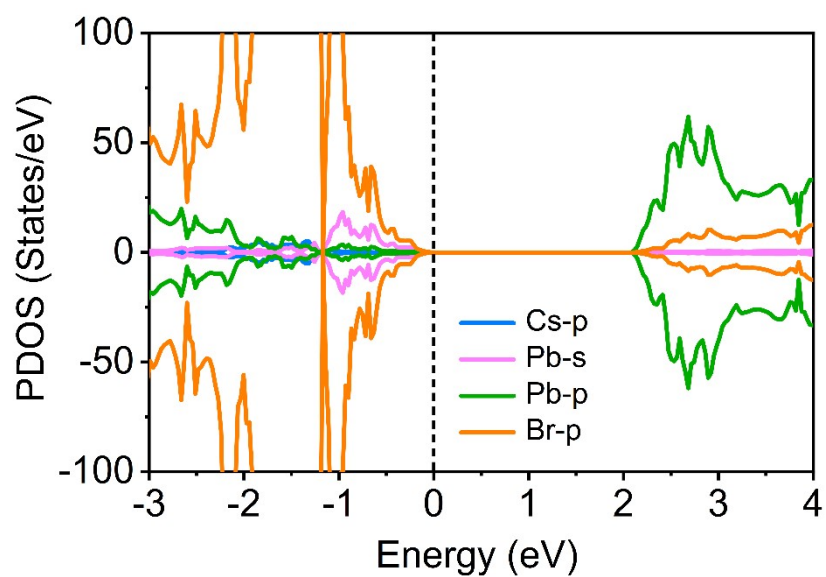

**Fig. S6** PDOS of single Br vacancy with positive charge  $V1+ Br$ , where black dash line shows the location of  $E_F$ .

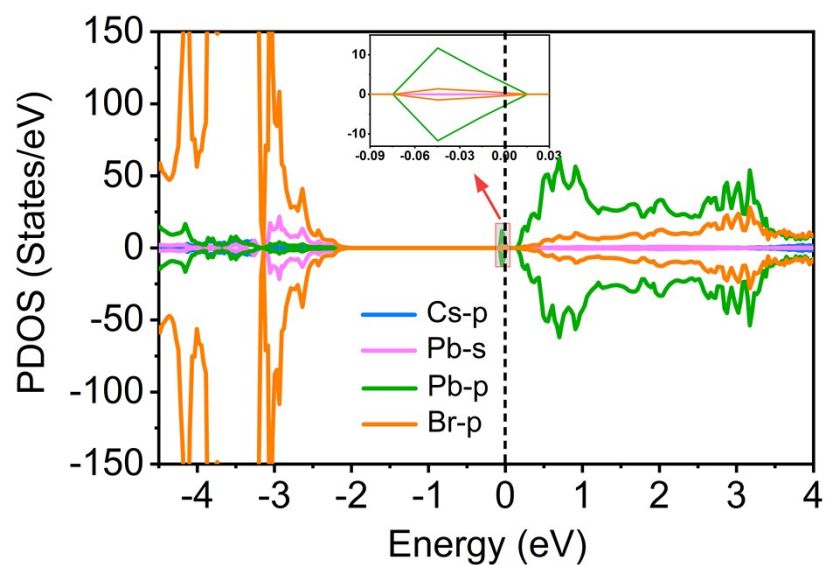

**Fig. S7** The PDOS of evenly separated  $DV_{Br}$ , with the inset provides an enlarged view of the defect state near the  $E_F$ .

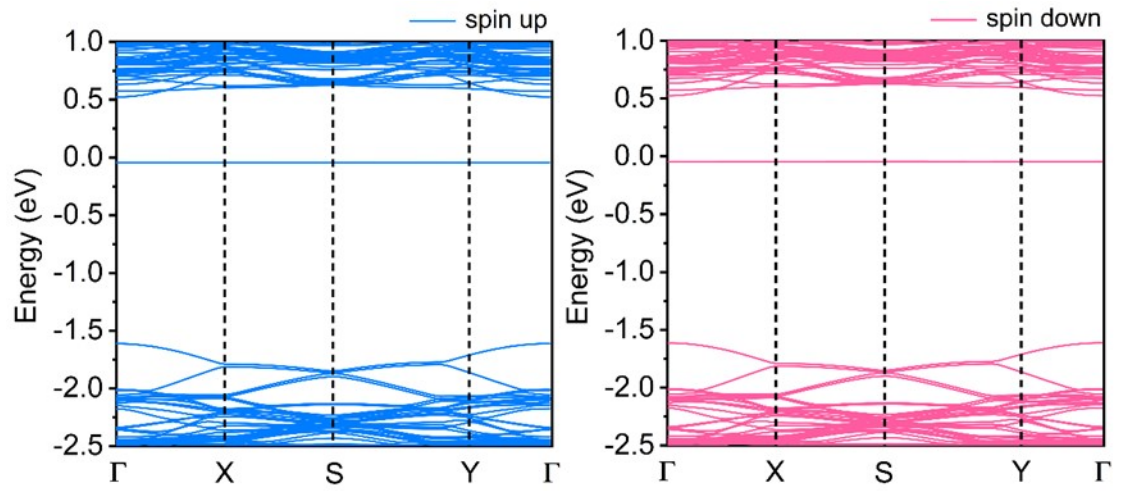

**Fig. S8** Band structure of Br divacancy. Blue lines represent the spin-up states (left), and the pink lines represent the spin-down states (right).

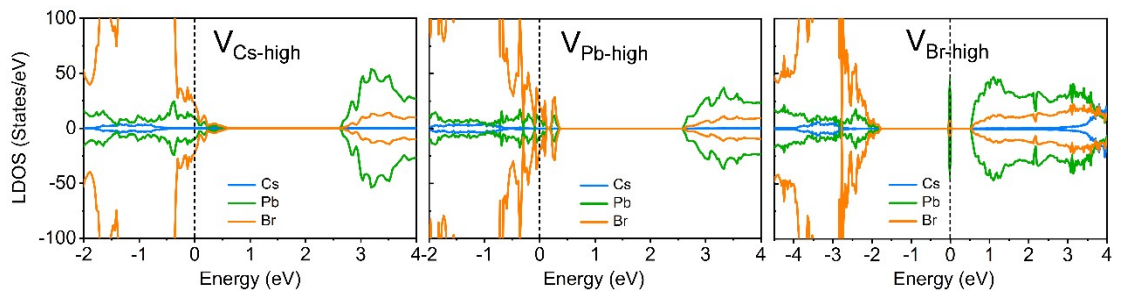

**Fig. S9** LDOS of defected  $\text{CsPbBr}_3$  at high defect concentrations, where black dash line shows the location of  $E_F$ .
